# Supplementary material for: A Real-World Systematic Analysis of Driver Mutations’ Prevalence in Early- and Advanced-Stage NSCLC: Implications for Targeted Therapies in the Adjuvant Setting
Source: MDPI journal article supplement (doi:10.3390/cancers14122971), 2022-06-16
Supplement: s1 [file s1]

**Table S1.** Relationship between PD-L1 expression and sampling modality.

| PD-L1     | Type of sample  |                    | Total      |
|-----------|-----------------|--------------------|------------|
|           | Surgical sample | Cytology or Biopsy |            |
|           | N (%)           | N (%)              |            |
| score 0–1 | 364 (34)        | 716 (66)           | 1080 (100) |
| score 2   | 77 (28)         | 194 (72)           | 271 (100)  |
| Total     | 441 (33)        | 910 (67)           | 1351 (100) |

The table shows no significant difference in PD-L1 expression comparing surgical resection vs. biopsy or cytology samples ( $p = 0.097$ ).

**Table S2.** Relationship between PD-L1 expression and tissue type.

| PD-L1     | Type of diagnosis |            | Total      |
|-----------|-------------------|------------|------------|
|           | Primary           | Metastatic |            |
|           | N (%)             | N (%)      |            |
| score 0–1 | 698 (65)          | 382 (35)   | 1080 (100) |
| score 2   | 160 (59)          | 111 (41)   | 271 (100)  |
| Total     | 858 (64)          | 493 (36)   | 1351 (100) |

The table shows no significant difference in PD-L1 expression comparing primary tumors vs. metastases ( $p = 0.087$ ).

**Table S3.** Relationship between PD-L1 expression and advanced or metastatic stages.

| PD-L1     | Advanced or Metastatic stages |          | Total      |
|-----------|-------------------------------|----------|------------|
|           | stage IIIA+IIIB               | stage IV |            |
|           | N (%)                         | N (%)    |            |
| score 0–1 | 215 (25)                      | 637 (75) | 852 (100)  |
| score 2   | 59 (27)                       | 162 (73) | 221 (100)  |
| Total     | 274 (26)                      | 799 (74) | 1073 (100) |

The table shows no significant difference in PD-L1 expression comparing locally advanced tumors (stages IIIA and IIIB) *versus* metastatic tumors (stage IV) ( $p = 0.657$ ).
